# Supplementary material for: Characterizing the Processes for Navigating Internet Health Information Using Real-Time Observations: A Mixed-Methods Approach
Source: PubMed Central journal article supplement (PMC4527005; doi:10.2196/jmir.3945), 2015-07-20
Supplement: jmir_v17i7e173_app1.pdf [file jmir_v17i7e173_app1.pdf]

# Internet Health Information Seeking

We are interested in the ways people are using Internet health information to make health decisions. This is a survey to see if you are eligible to participate in our study.

Thank you!

---

---

## Please complete the survey below.

Are you between the ages of 18 and 35 years old?  Yes  
 No

---

---

## Internet for Health Information

In the past 12 months, have you used the Internet to look for health or medical information for yourself?  Yes  
 No

---

---

## Health Care Services Utilization and Access

Do you have a personal doctor or medical provider who is your main provider?  Yes  
 No  
 Refused  
 Don't know

During the past 12 months, did you phone or e-mail the doctor's office with a medical question?  Yes  
 No  
 Refused  
 Don't know

How often did you get an answer as soon as you needed it?  Never  
 Sometimes  
 Usually  
 Always  
 Refused  
 Don't know

During the past 12 months, did you delay or not get any other medical care you felt you needed-- such as seeing a doctor, a specialist, or other health professional?  Yes  
 No  
 Refused  
 Don't know

Was cost or lack of insurance a reason why you delayed or did you get the care you felt you needed?  Yes  
 No  
 Refused  
 Don't know

In the past 12 months, how often did you feel you could rely on your doctors, nurses, or other health care professionals to take care of your health care needs?  Always  
 Usually  
 Sometimes  
 Never

How would you normally travel to see a health care provider?  Drive myself  
 Have a friend/family member drive me  
 Take public transportation
